CORRECTION

# Correction: Health Seeking Behaviour and Treatment Intentions of Dengue and Fever: A Household Survey of Children and Adults in Venezuela

The *PLOS Neglected Tropical Diseases* Staff

[S3 Table](#) is a duplicate of S2 Table. Please view the correct [S3 Table](#) below.

## Supporting Information

**S3 Table. Supplementary dataset.** This file includes supplementary data.  
(PDF)

## Reference

1. Elsinga J, Lizarazo EF, Vincenti MF, Schmidt M, Velasco-Salas ZI, Arias L, et al. (2015) Health Seeking Behaviour and Treatment Intentions of Dengue and Fever: A Household Survey of Children and Adults in Venezuela. *PLoS Negl Trop Dis* 9(12): e0004237. doi:[10.1371/journal.pntd.0004237](https://doi.org/10.1371/journal.pntd.0004237) PMID: [26624283](https://pubmed.ncbi.nlm.nih.gov/26624283/)

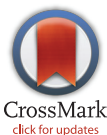

## OPEN ACCESS

**Citation:** The *PLOS Neglected Tropical Diseases* Staff (2016) Correction: Health Seeking Behaviour and Treatment Intentions of Dengue and Fever: A Household Survey of Children and Adults in Venezuela. *PLoS Negl Trop Dis* 10(1): e0004366. doi:[10.1371/journal.pntd.0004366](https://doi.org/10.1371/journal.pntd.0004366)

**Published:** January 4, 2016

**Copyright:** © 2016 The PLOS Neglected Tropical Diseases Staff. This is an open access article distributed under the terms of the [Creative Commons Attribution License](https://creativecommons.org/licenses/by/4.0/), which permits unrestricted use, distribution, and reproduction in any medium, provided the original author and source are credited.
